# Supplementary material for: Data-adaptive image-denoising for detecting and quantifying nanoparticle entry in mucosal tissues through intravital 2-photon microscopy
Source: publisher site journal article supplement (doi:10.3762/bjnano.5.210), 2014-11-06
Supplement: Additional file 1 [file 2190-4286-5-210-S1.pdf]

## **Supporting Information**

for

### **Data-adaptive image-denoising for detecting and quantifying nanoparticle entry in mucosal tissues through intravital 2-photon microscopy**

Torsten Bölke<sup>1</sup>, Lisa Krapf<sup>2</sup>, Regina Orzekowsky-Schroeder<sup>3</sup>, Tobias Vossmeier<sup>4</sup>, Jelena Dimitrijevic<sup>4</sup>, Horst Weller<sup>4</sup>, Anna Schüth<sup>5</sup>, Antje Klinger<sup>5</sup>, Gereon Hüttmann<sup>2</sup> and Andreas Gebert\*<sup>1</sup>

Address: <sup>1</sup>University Hospital Jena, Friedrich Schiller University Jena, Institute of Anatomy II, Teichgraben 7, 07740 Jena, Germany; <sup>2</sup>University of Lübeck, Institute of Biomedical Optics, Peter-Monnik-Weg 4, 23562 Lübeck, Germany; <sup>3</sup>Olympus Winter & Ibe GmbH, R&D Optical Design, Kuehnstrasse 61, 22045 Hamburg, Germany; <sup>4</sup>University of Hamburg, Institute of Physical Chemistry, Grindelallee 117, 20146 Hamburg, Germany and <sup>5</sup>University of Lübeck, Institute of Anatomy, Ratzeburger Allee 160, 23538 Lübeck, Germany

Email: Andreas Gebert\* - andreas.gebert@med.uni-jena.de

\* Corresponding author

### **Additional experimental data**

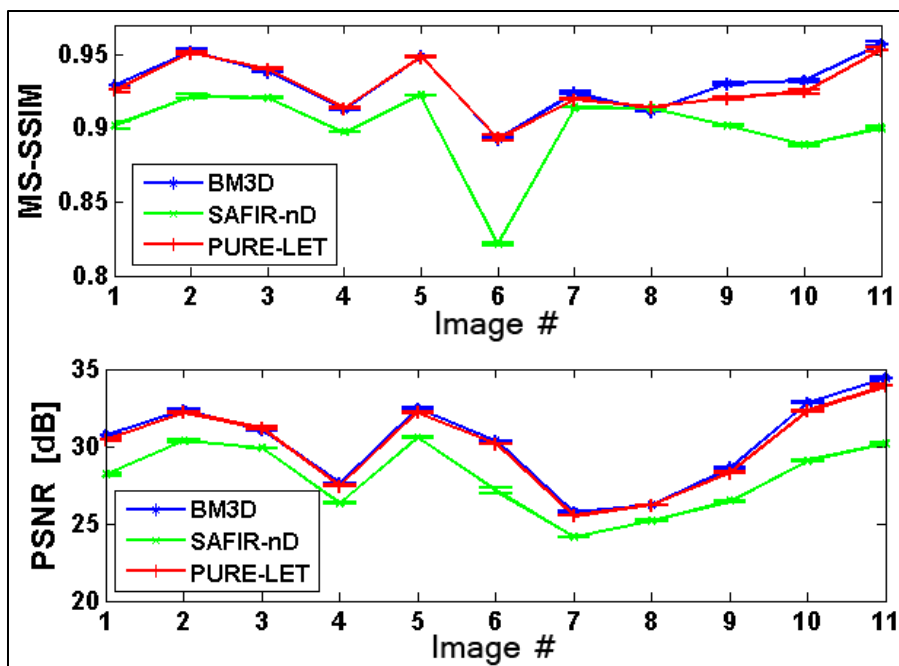

**Figure S1:** Quantitative evaluation of the denoising power of the BM3D, SAFIR-nD, and PURE-LET algorithms.

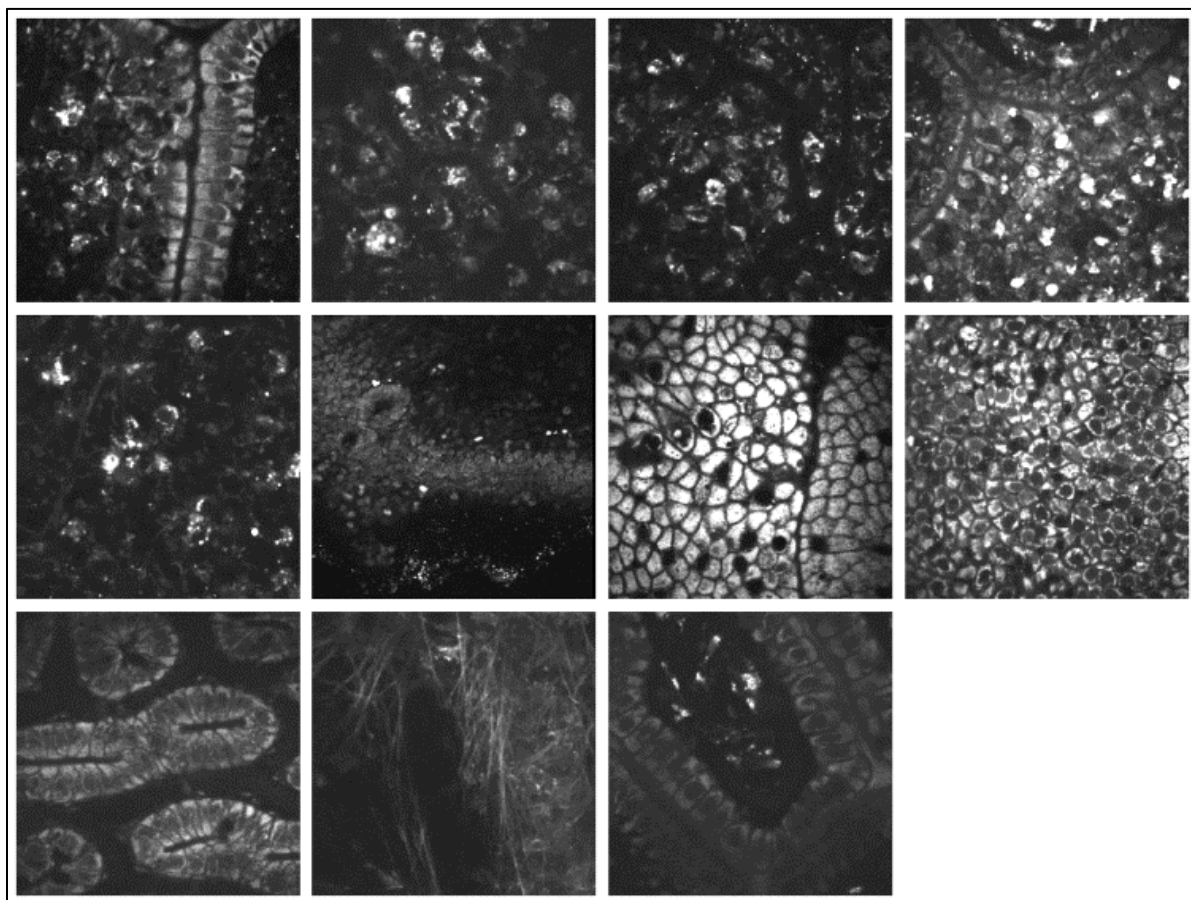

**Figure S2:** Set of 2PM images used as ground truth signal for quantitative evaluation of the different denoising methods.
